# Supplementary material for: Two-Stage Deep-Learning Classifier for Diagnostics of Lung Cancer Using Metabolites
Source: MDPI journal article supplement (doi:10.3390/metabo13101055), 2023-10-07
Supplement: s1 [file s1]

# Two-Stage Deep-Learning Classifier for Diagnostics of Lung Cancer Using Metabolites

Ashvin Choudhary, Jianpeng Yu, Valentina Kouznetsova, Igor Tsigelny, and Santosh Kesari

**Supplemental Table S1.** Metabolites used as lung cancer biomarkers (References numbers are from the main article).

| Name of Metabolite                                              | Type | Reference Number |
|-----------------------------------------------------------------|------|------------------|
| 1-Methylxanthine                                                | SQ   | 8                |
| 1,6-Anhydroglucose                                              | SQ   | 8                |
| 10-nonadecenoate                                                | AD   | 8                |
| 12-HETE                                                         | SQ   | 8                |
| 17-methylstearate                                               | SQ   | 8                |
| 2-deoxyadenosine 5-monophosphate                                | SQ   | 8                |
| 2-deoxyguanosine                                                | AD   | 8                |
| 2-Hydroxybutyrate                                               | SC   | 14               |
| 2-hydroxybutyrate                                               | AD   | 8                |
| 2-methylsuccinic acid                                           | AD   | 8                |
| 2-O-methylguanosine                                             | SQ   | 8                |
| 2-piperidinone                                                  | SQ   | 8                |
| 3-hydroxybutyrate                                               | SC   | 14               |
| 3-Hydroxydecanoate                                              | AD   | 8                |
| 3-hydroxydecanoate                                              | SC   | 14               |
| 3-Methyl-2-oxobutyrate                                          | NS   | 8                |
| 3-methylhistamine                                               | NS   | 8                |
| 3-phenylpropanoic acid                                          | AD   | 8                |
| 4-acetamido-3-methoxyphenyl<br>beta-D-glucopyranosiduronic acid | SQ   | 8                |
| 4-acetamidophenol                                               | SC   | 14               |
| 4-hydroxyproline                                                | SC   | 14               |
| 5-dodecenoate                                                   | NS   | 8                |
| 5-methylthioadenosine                                           | AD   | 8                |
| 7-dehydrocholesterol                                            | AD   | 8                |
| 8-Tocopherol                                                    | AD   | 8                |
| a-glucopyranosiduronic acid                                     | SC   | 14               |
| a-hydroxybutyric acid                                           | AD   | 8                |
| acetoacetate                                                    | AD   | 8                |

---

|                            |    |    |
|----------------------------|----|----|
| acetylcarnitine            | AD | 8  |
| acisoga                    | SC | 14 |
| adenosine 5-monophosphate  | SC | 14 |
| adenosine 5'-monophosphate | NS | 8  |
| ADpSGEGDFXAEGGGVR          | AD | 8  |
| adrenate                   | SC | 14 |
| Alanine                    | AD | 8  |
| alanylleucine              | SC | 14 |
| alanylphenylalanine        | NS | 8  |
| alanylphenylalanine        | AD | 8  |
| arachidonate               | AD | 8  |
| arachidonic acid           | SQ | 8  |
| arginine                   | SQ | 8  |
| ascorbate                  | NS | 8  |
| aspartic acid              | SQ | 8  |
| aspartyltryptophan         | SC | 14 |
| atenolol                   | SC | 14 |
| azelate                    | SQ | 8  |
| bilirubin                  | AD | 8  |
| carnitine                  | AD | 8  |
| cellobiose                 | AD | 8  |
| cholate                    | SC | 14 |
| cis-inositol               | NS | 8  |
| citric acid                | AD | 8  |
| cortisol                   | NS | 8  |
| cysteine                   | SQ | 8  |
| dehydromucic acid          | NS | 8  |
| delta-tocopherol           | AD | 8  |
| DGLA                       | SQ | 8  |
| dipropylacetic acid        | SQ | 8  |
| docosadienoate             | SQ | 8  |
| docosadienoate             | AD | 8  |
| docosapentaenoate          | AD | 8  |
| docosatrienoate            | SC | 14 |
| DSGEGDFXAEGGGVR            | NS | 8  |
| eicosanoic acid            | SQ | 8  |
| Eicosenoate                | SC | 14 |
| eicosenoate                | NS | 8  |
| eicosenoylglycerol         | SC | 14 |
| erythritol                 | SC | 14 |
| erythronate                | NS | 8  |

---

|                         |    |    |
|-------------------------|----|----|
| galactonate             | AD | 8  |
| galactose               | SQ | 8  |
| gamma-glutamylcysteine  | SC | 14 |
| gamma-tocopherol        | SQ | 8  |
| glutamine-leucine       | NS | 8  |
| glutathione             | SQ | 8  |
| glycerol                | SQ | 8  |
| glycerol 2-phosphate    | SC | 14 |
| glycine                 | NS | 8  |
| glycochenodeoxycholate  | NS | 8  |
| glycocholate            | SQ | 8  |
| Hexanoylcarnitine       | AD | 8  |
| hydroxybutyrylcarnitine | NS | 8  |
| hypoxanthine            | AD | 8  |
| hypoxanthine            | SQ | 8  |
| I-urobilinogen          | AD | 8  |
| indoleacetylglutamine   | AD | 8  |
| isoleucine              | AD | 8  |
| isoleucylglutamine      | NS | 8  |
| isoleucylserine         | SC | 14 |
| laurylcarnitine         | NS | 8  |
| laurylcarnitine         | AD | 8  |
| leucine                 | SQ | 8  |
| leucylglutamine         | SC | 14 |
| leucylglycine           | SQ | 8  |
| linolenate              | AD | 8  |
| lysine                  | SC | 14 |
| malonic acid            | SQ | 8  |
| mannose                 | NS | 8  |
| methionine              | SC | 14 |
| methionine              | SQ | 8  |
| metoprolol              | SQ | 8  |
| myo-inositol            | SQ | 8  |
| N-(2-Furoyl)glycine     | SQ | 8  |
| N-(2-Furoyl)glycine     | AD | 8  |
| N-acetylaspartate       | NS | 8  |
| N-Acetylmethionine      | SC | 14 |
| N-Acetylneuraminate     | NS | 8  |
| N-acetylputrescine      | NS | 8  |
| N-ethylglycinexylidide  | SC | 14 |
| N(1)-acetylspermine     | SQ | 8  |

|                        |    |    |
|------------------------|----|----|
| N1-methyladenosine     | AD | 8  |
| naproxen               | AD | 8  |
| nonadecanoate          | SC | 14 |
| octadecanedioate       | SC | 14 |
| palmitoleic acid       | NS | 8  |
| palmitoylcarnitine     | SC | 14 |
| pelargonate            | SQ | 8  |
| pelargonate            | SQ | 8  |
| phenol                 | NS | 8  |
| phenylalanine          | SC | 14 |
| phenylalanine          | SQ | 8  |
| phenylalanylleucine    | SQ | 8  |
| phenylalanylvaline     | SC | 14 |
| phosphate              | AD | 8  |
| pyroglutamine          | SQ | 8  |
| quinat                 | AD | 8  |
| R-hydroxybutyric acid  | SQ | 8  |
| ribitol                | SQ | 8  |
| ribofuranose           | NS | 8  |
| ribose                 | NS | 8  |
| ribose                 | SQ | 8  |
| salicylic acid         | AD | 8  |
| serine                 | NS | 8  |
| serylleucine           | SQ | 8  |
| sorbitol               | AD | 8  |
| spermidine             | NS | 8  |
| stearoyl sphingomyelin | SC | 14 |
| sulfate                | SC | 14 |
| taurodeoxycholate      | SQ | 8  |
| theobromine            | SQ | 8  |
| theobromine            | NS | 8  |
| theophylline           | NS | 8  |
| threitol               | SC | 14 |
| threonine              | NS | 8  |
| threonylvaline         | NS | 8  |
| thymine                | SC | 14 |
| tocopherol             | SQ | 8  |
| trimethylamine N-oxide | AD | 8  |
| trizma acetate         | AD | 8  |
| tryptophan             | NS | 8  |
| tryptophan             | AD | 8  |

|                                           |    |    |
|-------------------------------------------|----|----|
| tyrosine                                  | NS | 8  |
| tyrosylleucine                            | NS | 8  |
| uridine 5-monophosphate                   | SQ | 8  |
| uridine diphosphate-N-acetylgalactosamine | SC | 14 |
| uridine monophosphate                     | NS | 8  |
| valine                                    | AD | 8  |
| valylglycine                              | SQ | 8  |
| valylisoleucine                           | SQ | 8  |
| valylphenylalanine                        | NS | 8  |
| valylvaline                               | NS | 8  |
| xanthosine                                | AD | 8  |
| xanthosine 5-monophosphate                | AD | 8  |
